# Supplementary material for: Facile Synthesis of Nitrogen-Doped Graphene Quantum Dots/MnCO3/ZnMn2O4 on Ni Foam Composites for High-Performance Supercapacitor Electrodes
Source: MDPI journal article supplement (doi:10.3390/ma17040884), 2024-02-14
Supplement: s1 [file s1]

# Facile Synthesis of Nitrogen-Doped Graphene Quantum Dots/MnCO<sub>3</sub>/ZnMn<sub>2</sub>O<sub>4</sub> on Ni Foam Composites for High-Performance Supercapacitor Electrodes

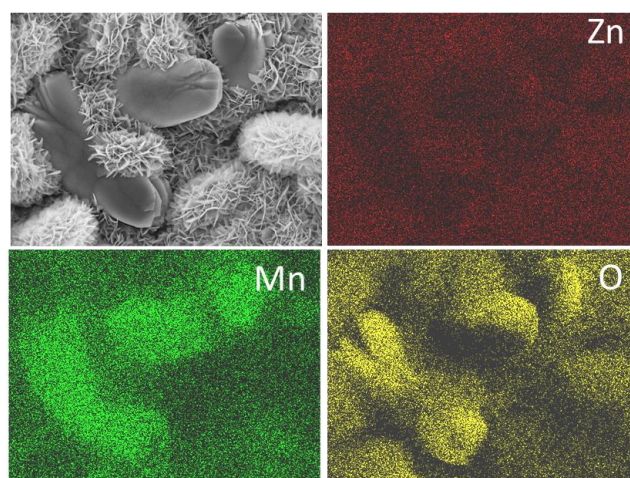

**Figure S1.** FESEM image and its EDS elemental mapping images of MC/ZM on Ni foam.

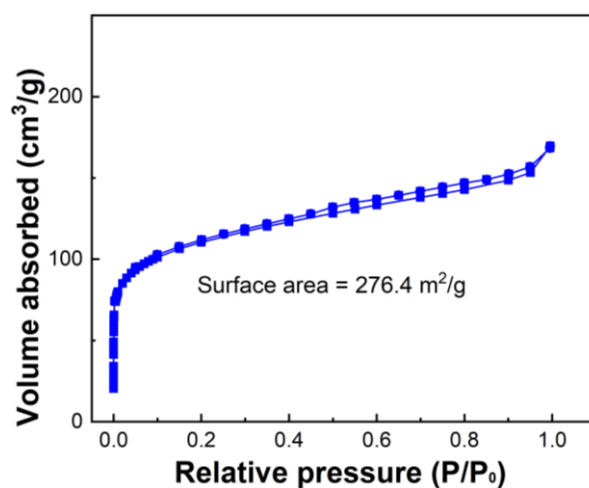

**Figure S2.** Nitrogen adsorption–desorption isotherms of N/MC/ZM.

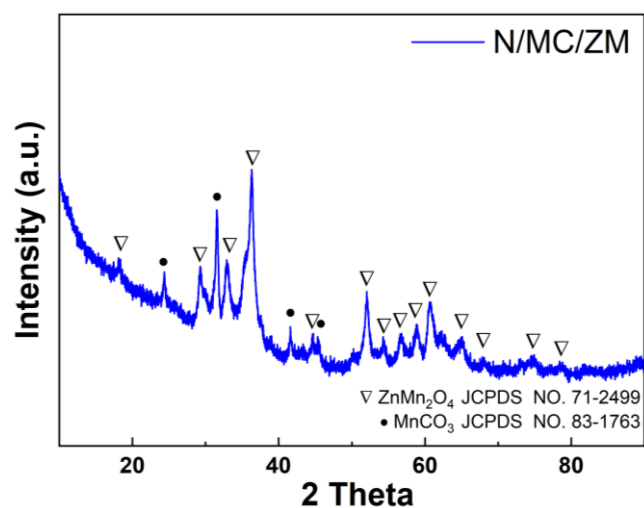

Figure S3. XRD patterns of N/MC/ZM composite.

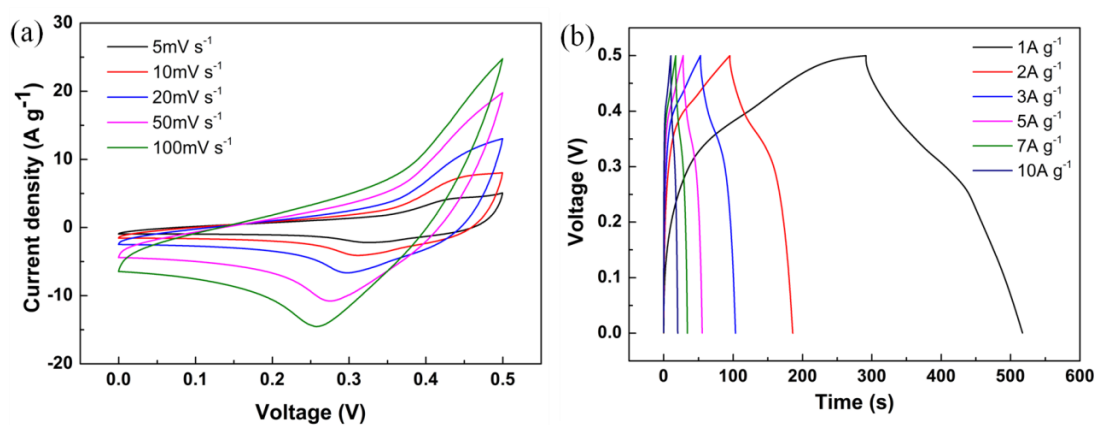

Figure S4. (a) CV curves of MC/ZM at different scan rates and (b) GCD curves of MC/ZM at different current densities.

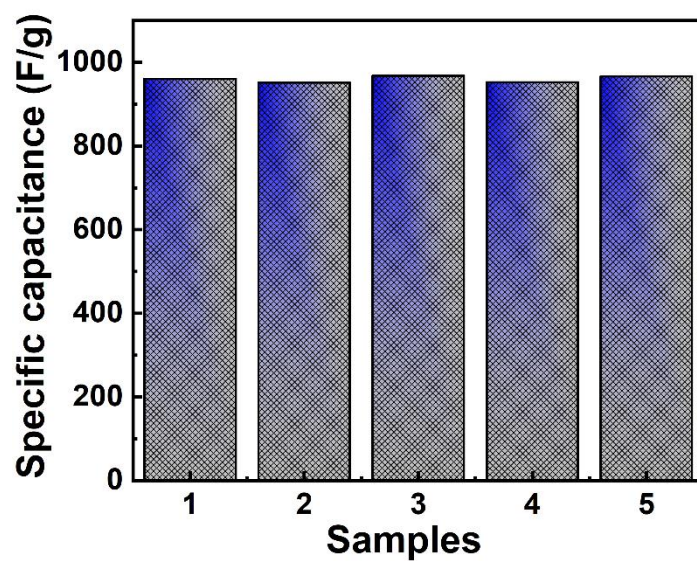

Figure S5. The calculated specific capacitances of different N/MC/ZM electrode samples.

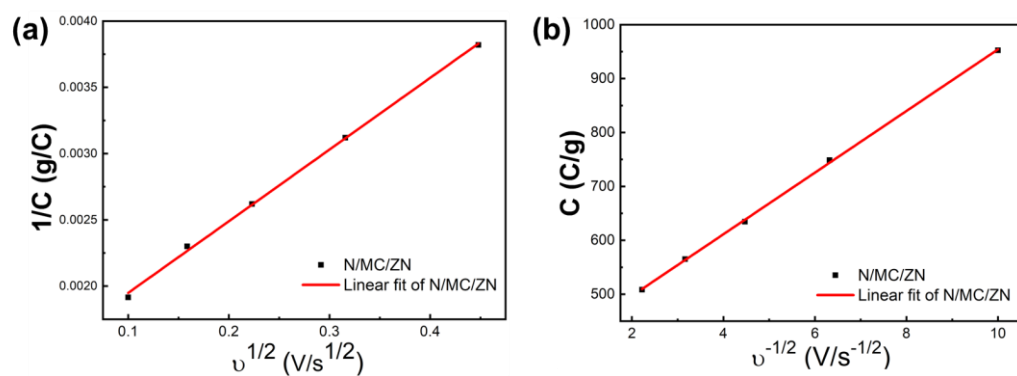

**Figure S6.** Linear fit of (a)  $C^{-1}$  as function of  $v^{1/2}$  and (b)  $C$  as function of  $v^{-1/2}$ .

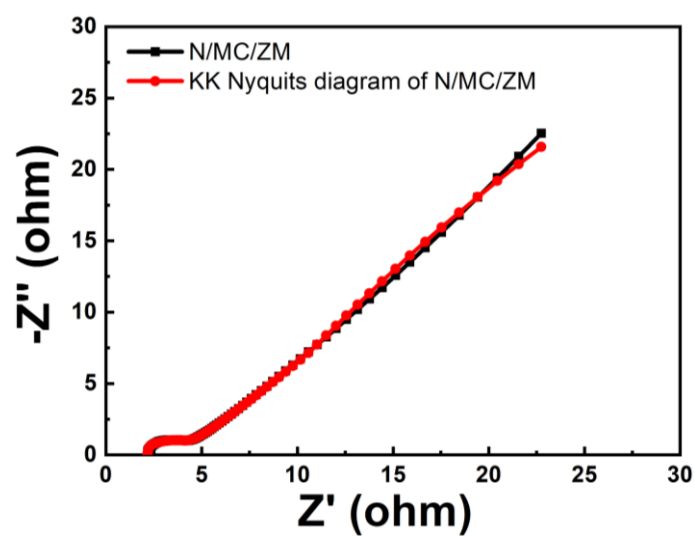

**Figure S7.** Nyquist plots measured using PEIS technique and Kramers-Kronig transforms.

**Table S1.** The specific capacitance comparison of N/MC/ZM composite with other Mn- and Zn based-electrodes.

| Materials                                                            | Electrolyte                          | Specific Capacitance                            | Ref        |
|----------------------------------------------------------------------|--------------------------------------|-------------------------------------------------|------------|
| Porous hollow double-walled Mn <sub>2</sub> O <sub>3</sub> nanocubes | 1 M KOH                              | 256.25 F·g <sup>-1</sup> @ 1 A g <sup>-1</sup>  | [47]       |
| Carbon- MnO <sub>x</sub>                                             | 6 M KOH                              | 213.7 F·g <sup>-1</sup> @ 0.5 A g <sup>-1</sup> | [48]       |
| K-dope MnO <sub>2</sub>                                              | 6 M KOH                              | 726 F·g <sup>-1</sup> @ 1 A g <sup>-1</sup>     | [49]       |
| ZnO/activated carbon                                                 | 1 M Na <sub>2</sub> SO <sub>4</sub>  | 298 F·g <sup>-1</sup> @ 1 A g <sup>-1</sup>     | [50]       |
| ZnO nanorod/MnO <sub>2</sub> nanowires                               | 1 M KOH                              | 304 F·g <sup>-1</sup> @ 1 A g <sup>-1</sup>     | [51]       |
| polyindole/NiO/ZnO                                                   | 1.0 M H <sub>2</sub> SO <sub>4</sub> | 310.9 F·g <sup>-1</sup> @ 0.5 A g <sup>-1</sup> | [52]       |
| N-GQDs/MnCO <sub>3</sub> /ZnMn <sub>2</sub> O <sub>4</sub>           | 1 M KOH                              | 960.6 F·g <sup>-1</sup> @ 1 A g <sup>-1</sup>   | This study |

**Table S2.** Fitted EIS values for the components of the Nyquist equivalent circuit.

| Component                           | N/MC/ZM | MC/ZM |
|-------------------------------------|---------|-------|
| R <sub>s</sub> (Ω)                  | 2.14    | 2.48  |
| R <sub>ct</sub> (Ω)                 | 1.12    | 4.02  |
| Q <sub>1</sub> (F·s <sup>-1</sup> ) | 0.009   | 0.002 |
| Q <sub>2</sub> (F·s <sup>-1</sup> ) | 0.749   | 0.401 |
